# Supplementary material for: Oncogenic KIT-induced aggressive systemic mastocytosis requires SHP2/PTPN11 phosphatase for disease progression in mice
Source: PubMed Central journal article supplement (PMC4171618; doi:10.18632/oncotarget.2177), 2014-07-07
Supplement: oncotarget-05-6130-s001.pdf [file oncotarget-05-6130-s001.pdf]

# Oncogenic KIT-induced aggressive systemic mastocytosis requires SHP2/PTPN11 phosphatase for disease progression in mice

## SUPPLEMENTARY MATERIAL

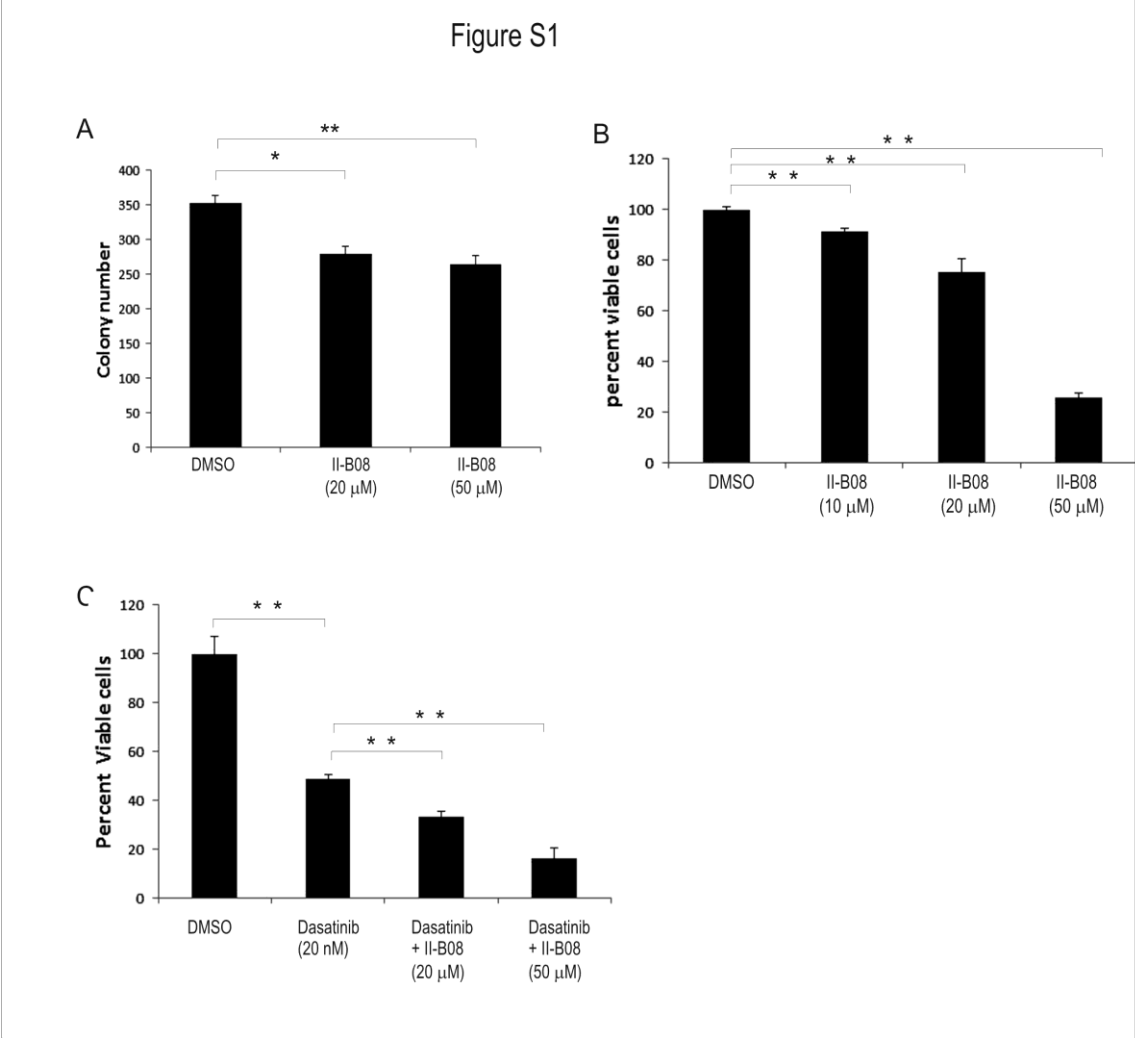

**Fig. S1: SHP2 inhibitor treatment blocks growth and survival of mouse mastocytoma cells.** A. Graph depicts average colony numbers (mean  $\pm$  SD) for P815 cells treated with DMSO or indicated concentrations of II-B08 in methyl cellulose medium at day 8 (triplicate samples; \* and \*\* indicates significant difference between treatments at  $p < 0.05$  and  $p < 0.01$ , respectively). B. P815 cells were treated with DMSO or II-B08 (10, 20 or 50  $\mu$ M) for 72h. Graph depicts the percentage of viable cells based on alamar blue assay (\*\* indicates significant difference between DMSO and II-B08 treated cells,  $p < 0.01$ ). C. P815 cells were treated with either DMSO, Dasatinib (20 nM), or Dasatinib (20 nM) plus II-B08 (20 or 50  $\mu$ M) for 72hours. Graph depicts the percentage of viable cells based on alamar blue assay (\*\* indicates significant difference between treatment groups,  $p < 0.01$ ).
